# Supplementary material for: Comparative efficacy of different types of acupuncture as adjuvant therapy on carotid atherosclerosis: a protocol for systematic review and network meta-analysis
Source: HighWire-hosted journal article supplement (doi:10.1136/bmjopen-2021-049778), 2022-04-01
Supplement: bmjopen-2021-049778supp001_data_supplement.pdf [file bmjopen-2021-049778supp001_data_supplement.pdf]

| Search strategy for EMBASE |                                            |
|----------------------------|--------------------------------------------|
| Number                     | Search items                               |
| #1                         | "Atherosclerosis"/exp                      |
| #2                         | Atheroscleroses: ab,ti                     |
| #3                         | Atherogenesis: ab,ti                       |
| #4                         | "Carotid atherosclerosis": ab,ti           |
| #5                         | #1 or #2 or #3 or #4                       |
| #6                         | "Acupuncture"/exp                          |
| #7                         | "Acupuncture Therapy": ab,ti               |
| #8                         | "Acupuncture, Ear": ab,ti                  |
| #9                         | "Acupuncture Points": ab,ti                |
| #10                        | Electroacupuncture: ab,ti                  |
| #11                        | "Auricular point": ab,ti                   |
| #12                        | #6 or #7 or #8 or #9 or #10 or #11         |
| #13                        | "Statins"/exp                              |
| #14                        | atorvastatin: ab,ti                        |
| #15                        | aspirin: ab,ti                             |
| #16                        | #13 or #14 or #15                          |
| #17                        | "randomized controlled trial"/exp          |
| #18                        | "randomized controlled trial": ab,ti       |
| #19                        | randomized: ab,ti                          |
| #20                        | randomly: ab,ti                            |
| #21                        | "controlled clinical trial": ab,ti         |
| #22                        | "clinical trial": ab,ti                    |
| #23                        | trial: ab,ti                               |
| #24                        | #17 or #18 or #19 or #20 or #21 or #22# 23 |
| #25                        | #5 and #12 and #16 and #24                 |

| Search strategy for Medline database |     |                       |     |              |     |                               |
|--------------------------------------|-----|-----------------------|-----|--------------|-----|-------------------------------|
| Atherosclerosis                      |     | Acupuncture           |     | Statins      |     | 'Randomized Controlled Trial' |
| OR                                   |     | OR                    |     | OR           |     | OR                            |
| Atheroscleroses                      |     | 'Acupuncture Therapy' |     | Atorvastatin |     | randomized                    |
| OR                                   |     | OR                    |     | OR           |     | OR                            |
| Atherogenesis                        | AND | 'Acupuncture, Ear'    | AND | Aspirin      | AND | randomly                      |
| OR                                   |     | OR                    |     |              |     | OR                            |
| 'Carotid                             |     | 'Acupuncture Points'  |     |              |     | 'Controlled Clinical Trial'   |
| atherosclerosis'                     |     | OR                    |     |              |     | OR                            |
|                                      |     | 'Electroacupuncture'  |     |              |     | 'clinical trial'              |
|                                      |     | OR                    |     |              |     | OR                            |
|                                      |     | 'Auricular point'     |     |              |     | trial                         |

| Search strategy for Cochrane Library |                                                                  |
|--------------------------------------|------------------------------------------------------------------|
| Number                               | Search items                                                     |
| #1                                   | MeSH descriptor: [Atherosclerosis] explode all trees             |
| #2                                   | Atheroscleroses: ti,ab,kw                                        |
| #3                                   | Atherogenesis: ti,ab,kw                                          |
| #4                                   | “Carotid atherosclerosis”: ti,ab,kw                              |
| #5                                   | #1 or #2 or #3 or #4                                             |
| #6                                   | MeSH descriptor: [Acupuncture] explode all trees                 |
| #7                                   | “Acupuncture Therapy”: ti,ab,kw                                  |
| #8                                   | “Acupuncture, Ear”: ti,ab,kw                                     |
| #9                                   | “Acupuncture Points”: ti,ab,kw                                   |
| #10                                  | Electroacupuncture: ti,ab,kw                                     |
| #11                                  | “Auricular point”: ti,ab,kw                                      |
| #12                                  | #6 or #7 or #8 or #9 or #10 or #11                               |
| #13                                  | MeSH descriptor: [Statins] explode all trees                     |
| #14                                  | atorvastatin: ti,ab,kw                                           |
| #15                                  | aspirin: ti,ab,kw                                                |
| #16                                  | #13 or #14 or #15                                                |
| #17                                  | MeSH descriptor: [Randomized Controlled Trial] explode all trees |
| #18                                  | “Randomized Controlled Trial”: ti,ab,kw                          |
| #19                                  | randomized: ti,ab,kw                                             |
| #20                                  | randomly: ti,ab,kw                                               |
| #21                                  | “controlled clinical trial”: ti,ab,kw                            |
| #22                                  | “clinical trial”: ti,ab,kw                                       |
| #23                                  | trial: ti,ab,kw                                                  |
| #24                                  | #17 or #18 or #19 or #20 or #21 or #22# 23                       |
| #25                                  | #5 and #12 and #16 and #24                                       |

---

**Search strategy for CNKI**

---

(主题或摘要: 动脉粥样硬化+动脉硬化+斑块+颈动脉粥样硬化+颈动脉硬化+颈动脉) AND (主题或摘要: 针刺+针灸+电针+温针灸+耳针+耳穴+穴位) AND (主题或摘要: 他汀类药物+阿司匹林) AND (主题或摘要: 随机对照研究+随机+对照研究+对照+试验+临床研究)

---

---

**Search strategy for WF**

---

(主题: 动脉粥样硬化+动脉硬化+斑块+颈动脉粥样硬化+颈动脉硬化+颈动脉) AND (主题: 针刺+针灸+电针+温针灸+耳针+耳穴+穴位) AND (主题: 他汀类药物+阿司匹林) AND (主题: 随机对照研究+随机+对照研究+对照+试验+临床研究)

---

---

**Search strategy for CQVIP**

---

(题名或关键词: 动脉粥样硬化+动脉硬化+斑块+颈动脉粥样硬化+颈动脉硬化+颈动脉) AND (题名或关键词: 针刺+针灸+电针+温针灸+耳针+耳穴+穴位) AND (题名或关键词: 他汀类药物+阿司匹林) AND (题名或关键词: 随机对照研究+随机+对照研究+对照+试验+临床研究)

---
